# Supplementary material
Source: Springer Nature journal article supplement (https://www.springermedizin.de/resource/supplementary/12916_2012_607_MOESM3_ESM.pdf/9597910)
Supplement: MOESM3 [file 9597910]

**No. of candidate markers**

**No. of clinical samples**

**Basic Research**

**Prioritisation - novelty / biology / antibodies..**

**Assay development & validation**

**Evaluation - clinical samples (retrospective)**

**Evaluation prospectively - clinical trial**

Discovery

Prioritisation

Verification

Clinical validation / utility
